# Supplementary material for: A Validity and Reliability Study of the Citizenship Fatigue Scale in a Turkish Sample
Source: Research Square preprint supplement (doi:10.21203/rs.3.rs-5773895/v1), 2025-01-09
Supplement: Supplementary file 1 [file 1068c591c6818cb094d7b510.docx]

**Supplamental Table 1.** Pearson correlation analysis results (N:348)

| **Variables** | **Min-Max** | **±*ss*** |  | **Citizenship Fatigue** | **Compulsory**  **Citizenship** |
| --- | --- | --- | --- | --- | --- |
| **Citizenship Fatigue** | 1-5 | 3.25±0.97 | r | 1 | .654** |
| p |  | .000 |
| **Compulsory Citizenship** | 1-5 | 3.01±0.99 | r | .654** | 1 |
| p | .000 |  |
| **Skewness** |  |  |  | -.109 | -.587 |
| **Kurtosis** |  |  |  | -.006 | -.309 |
| **Cronbach's Alpha** |  |  |  | .929 | .902 |

***p<0.01*

**Supplamental Table 2.** Citizenship fatigue of nurses and factors affecting compulsory citizenship behavior (N:348)

| **Variables** |  | **Citizenship Fatigue** | | **Compulsory Citizenship Behavior** | | |
| --- | --- | --- | --- | --- | --- | --- |
| **N** | **±*ss*** | Test value | **±*ss*** | | Test value |
| **Gender** |  |  |  |  | |  |
| Female | 296 | 3.29±0.92 | t:1.472 | 3.05±0.92 | | t:1.628 |
| Male | 52 | 3.07±1.22 | p:0.142 | 2.80±1.28 | | p:0.104 |
| **Marital Status** |  |  |  |  | |  |
| Single | 236 | 3.19±0.97 | t:-1.846 | 2.95±1.03 | | t:-1.747 |
| Married | 112 | 3.39±0.96 | p:0.066 | 3.14±0.88 | | p:0.082 |
| **Age** |  |  |  |  | |  |
| 20-30 | 259 | 3.24±0.94 |  | 2.96±0.99 | |  |
| 31-40 | 49 | 3.38±1.10 | f:0.515 | 3.01±0.88 | | f:1.947 |
| 41 and over | 40 | 3.20±1.02 | p:0.598 | 3.02±0.99 | | p:0.144 |
| **Educational Status** |  |  |  |  | |  |
| Vocational High School of Health | 30 | 3.26±1.01 |  | 3.11±0.99 | |  |
| Associate Degree | 18 | 3.55±1.20 | f:0.660 | 3.14±1.18 | | f:0.252 |
| Bachelor's Degree | 264 | 3.25±0.94 | p:0.577 | 3.00±1.02 | | p:0.860 |
| Postgraduate | 36 | 3.17±1.03 |  | 2.96±0.83 | |  |
| **Unit** |  |  |  |  | |  |
| Emergency service 1 | 48 | 3.44±0.94 |  | 3.18±0.95 | |  |
| Internal units 2 | 134 | 3.24±0.93 | f:1.101 | 3.18±0.90 | | f:5.662 |
| Surgical units 3 | 166 | 3.21±1.01 | p:0.334 | 2.82±1.03 | | p:0.004* |
| Differences between groups |  |  |  | 2>3 | |  |
| **Total Professional Years** |  |  |  |  | |  |
| 1-3 years 1 | 163 | 3.10±0.88 |  | 2.88±0.97 | |  |
| 4-6 years 2 | 80 | 3.58±0.96 | f:4.469 | 3.22±1.02 | | f:2.125 |
| 7-10 years 3 | 40 | 3.30±1.11 | p:0.004* | 3.09±1.16 | | p:0.097 |
| 11 years and above 4 | 65 | 3.23±1.03 |  | 3.02±0.84 | |  |
| Differences between groups |  | 2>3 |  |  | |  |
| **Duration of Experience in the Institution** | | |  |  | |  |
| 1-3 years 1 | 195 | 3.17±0.89 |  | 2.93±0.97 | |  |
| 4-6 years 2 | 74 | 3.46±0.99 | f:1.761 | 3.18±1.05 | | f:1.343 |
| 7-10 years 3 | 29 | 3.37±1.15 | p:0.154 | 3.13±1.07 | | p:0.260 |
| 11 years and above 4 | 50 | 3.23±1.09 |  | 3.00±0.87 | |  |
| **Duration of Experience in the Unit** |  |  |  |  | |  |
| 1-3 years | 263 | 3.17±0.89 |  | 2.93±0.97 | |  |
| 4-6 years | 47 | 3.46±0.99 | f:1.761 | 3.18±1.05 | | f:1.343 |
| 7-10 years | 15 | 3.37±1.15 | p:0.154 | 3.13±1.07 | | p:0.260 |
| 11 years and above | 23 | 3.23±1.09 |  | 3.00±0.87 | |  |
| **How long have you been working in your current position?** | | | | |  | |
| 1-3 years | 198 | 3.17±0.93 |  | 2.95±0.99 | |  |
| 4-6 years | 87 | 3.42±0.92 | f:1.646 | 3.09±0.94 | | f:0.885 |
| 7-10 years | 31 | 3.42±1.07 | p:0.179 | 3.21±1.13 | | p:0.449 |
| 11 years and above | 32 | 3.17±1.17 |  | 2.93±0.96 | |  |
| **Type of Work Schedule** |  |  |  |  | |  |
| Day shifts | 104 | 3.13±0.89 | t:-1.622 | 2.97±0.87 | | t:-0.523 |
| Day and night shifts | 244 | 3.31±1.01 | p:0.106 | 3.03±1.03 | | p:0.601 |
| **Position** |  |  |  |  | |  |
| Nurse | 296 | 3.28±0.96 |  | 3.04±1.01 | |  |
| Charge Nurse | 19 | 3.14±0.96 | f:0.529 | 2.76±0.79 | | f:0.851 |
| Other | 33 | 3.12±1.07 | p:0.590 | 2.91±0.83 | | p:0.428 |
| **Passion for the Profession** |  |  |  |  | |  |
| Yes | 306 | 3.15±0.94 | t:-5.468 | 2.90±0.93 | | t:-5.990 |
| No | 42 | 4.00±0.85 | p:0.000* | 3.83±0.98 | | p:0.000* |
| **Are you satisfied with your profession?** | |  |  |  | |  |
| Yes | 278 | 3.06±0.91 | t:-8.193 | 2.83±0.91 | | t:-7.226 |
| No | 70 | 4.04±0.80 | p:0.000* | 3.72±0.97 | | p:0.000* |

**p<0.05*
